# Supplementary material for: A Francisella-like endosymbiont in the Gulf Coast tick evolved from a mammalian pathogen
Source: PubMed Central journal article supplement (PMC5028885; doi:10.1038/srep33670), 2016-09-20
Supplement: srep33670-s1.pdf [file srep33670-s1.pdf]

***A Francisella-like endosymbiont in the Gulf Coast tick evolved from a mammalian pathogen***

Jonathan G. Gerhart, Abraham S. Moses, Rahul Raghavan

Department of Biology and Center for Life in Extreme Environments,  
Portland State University, Portland, Oregon, 97201, USA.

**Table S1.** Assembly statistics for FLE-Am contigs.

| <b>Identity</b>   | <b>Contigs<br/>&gt;1kb</b> | <b>Total<br/>Length<br/>(bp)</b> | <b>Reads</b> | <b>% GC</b> |
|-------------------|----------------------------|----------------------------------|--------------|-------------|
| Trimmed Reads     |                            |                                  | 291,344,244  | 45          |
| Assembled Contigs | 4603                       | 9,312,626                        | 10,274,914   | 43          |
| Bacteria Assigned | 48                         | 1,560,742                        | 1,287,780    | 33          |
| Francisellaceae   | 46                         | 1,614,058                        | 1,259,156    | 32.90       |
| Flavobacteriaceae | 1                          | 2,366                            | 908          | 38.10       |
| Anaeromyxobacter  | 1                          | 2,121                            | 1,194        | 59.40       |
| N50 (386,665 bp)  |                            |                                  |              |             |

Table S2. Pathogenic features in FLE-Am and *F. tularensis* SCHU-S4.

| Category <sup>a</sup>                      | Locus tag <sup>b</sup> | Function | <i>F. tularensis</i> |                     |
|--------------------------------------------|------------------------|----------|----------------------|---------------------|
|                                            |                        |          | SCHU-S4              | FLE-Am <sup>c</sup> |
| <b>LPS, Capsule and Membrane synthesis</b> |                        |          |                      |                     |
|                                            | FTT_0286c              | LPS      | +                    | Φ                   |
|                                            | FTT_0454               | LPS      | +                    | Φ                   |
|                                            | FTT_0455c              | LPS      | +                    | +                   |
|                                            | FTT_0789               | Capsule  | +                    | +                   |
|                                            | FTT_0790               | Capsule  | +                    | Φ                   |
|                                            | FTT_0791               | Capsule  | +                    | Φ                   |
|                                            | FTT_0792               | Capsule  | +                    | -                   |
|                                            | FTT_0793               | Capsule  | +                    | -                   |
|                                            | FTT_0794               | Capsule  | +                    | -                   |
|                                            | FTT_0795               | Capsule  | +                    | -                   |
|                                            | FTT_0796               | Capsule  | +                    | -                   |
|                                            | FTT_0797               | Capsule  | +                    | -                   |
|                                            | FTT_0798               | Capsule  | +                    | -                   |
|                                            | FTT_0799               | Capsule  | +                    | -                   |
|                                            | FTT_0800               | Capsule  | +                    | Φ                   |
|                                            | FTT_0805               | Unkown   | +                    | +                   |
|                                            | FTT_0807               | Unkown   | +                    | +                   |
|                                            | FTT_0806               | Unkown   | +                    | Φ                   |
|                                            | FTT_0891               | LPS      | +                    | +                   |
|                                            | FTT_1236               | Capsule  | +                    | +                   |
|                                            | FTT_1237               | LPS      | +                    | +                   |
|                                            | FTT_1238c              | Capsule  | +                    | +                   |
|                                            | FTT_1450c              | Both     | +                    | Φ                   |
|                                            | FTT_1453c              | LPS      | +                    | -                   |
|                                            | FTT_1455c              | Both     | +                    | -                   |
|                                            | FTT_1458c              | LPS      | +                    | -                   |
|                                            | FTT_1460c              | LPS      | +                    | -                   |
|                                            | FTT_1461c              | LPS      | +                    | -                   |
|                                            | FTT_1462c              | Both     | +                    | +                   |
|                                            | FTT_1463c              | Both     | +                    | +                   |
|                                            | FTT_1464c              | Both     | +                    | +                   |
|                                            | FTT_1561               | LPS      | +                    | +                   |
|                                            | FTT_1571c              | LPS      | +                    | +                   |
|                                            | FTT_1643c              | LPS      | Φ                    | +                   |
| <b>Type 4 Pili</b>                         |                        |          |                      |                     |
|                                            | FTT_1134               | Pilin    | +                    | Φ                   |
|                                            | FTT_0890c              | Pilin    | +                    | Φ                   |
|                                            | FTT_0889c              | Pilin    | +                    | Φ                   |
|                                            | FTT_0888c              | Pilin    | +                    | Φ                   |

|                                |           |                   |   |   |
|--------------------------------|-----------|-------------------|---|---|
|                                | FTT_0861c | Pilin             | + | Φ |
|                                | FTT_0230c | Pilin             | + | + |
|                                | FTT_1341c | Pilin             | + | + |
|                                | FTT_1133  | Assembly ATPase   | + | Φ |
|                                | FTT_0905  | PilE1 glycosylase | + | Φ |
|                                | FTT_1156c | OM unit           | + | Φ |
|                                | FTT_0088  | Retraction ATPase | + | Φ |
|                                | FTT_0715  | Secreted          | + | - |
|                                | FTT_1786c | Secreted          | + | - |
|                                | FTT_1577  | Secreted          | + | Φ |
|                                | FTN_1186  | Secreted          | - | - |
|                                | FTT_1069  | Secreted          | + | - |
|                                | FTT_0580  | Secreted          | + | + |
|                                | FTT_1330  | Secreted          | + | + |
| <b>Hypothetical porins</b>     |           |                   |   |   |
|                                | FTT_0025c | Outer Membrane    | + | Φ |
|                                | FTT_0119  | Outer Membrane    | + | + |
| <b>Outer Membrane Proteins</b> |           |                   |   |   |
|                                | FTT_0369c | Outer Membrane    | + | + |
|                                | FTT_0583  | Outer Membrane    | + | + |
|                                | FTT_0831c | Outer Membrane    | + | + |
|                                | FTT_0918  | Outer Membrane    | + | + |
|                                | FTT_1103  | Outer Membrane    | + | + |
|                                | FTT_1346  | Outer Membrane    | + | Φ |
|                                | FTT_1416c | Outer Membrane    | + | Φ |
|                                | FTT_1724c | Outer Membrane    | + | + |
| <b>Inner Membrane Proteins</b> |           |                   |   |   |
|                                | FTT_0094c | Inner Membrane    | + | + |
|                                | FTT_0181c | Inner Membrane    | + | + |
|                                | FTT_0345  | Inner Membrane    | + | + |
|                                | FTT_0398c | Inner Membrane    | + | + |
|                                | FTT_0399c | Inner Membrane    | + | + |
|                                | FTT_0404  | Inner Membrane    | + | + |
|                                | FTT_0715  | Inner Membrane    | + | - |
|                                | FTT_0879  | Inner Membrane    | + | + |
|                                | FTT_0891  | Periplasm         | + | + |
|                                | FTT_1736c | Inner Membrane    | + | - |
| <b>Secretion systems</b>       |           |                   |   |   |
|                                | FTT_0068  | Secreted          | + | + |
|                                | FTT_0221  | Secreted          | + | - |
|                                | FTT_0484  | Secreted          | + | + |
|                                | FTT_0611c | Secreted          | + | Φ |
|                                | FTT_0721  | Secreted          | + | Φ |
|                                | FTT_1095  | Type 1 System     | + | + |

|           |                |   |   |
|-----------|----------------|---|---|
| FTT_1258  | Type 1 System  | + | - |
| FTT_1269c | Secreted DNA K | + | + |
| FTT_1344  | Type 6 System  | + | Φ |
| FTT_1345  | Type 6 System  | + | Φ |
| FTT_1346  | Type 6 System  | + | Φ |
| FTT_1347  | Type 6 System  | + | + |
| FTT_1348  | Type 6 System  | + | - |
| FTT_1349  | Type 6 System  | + | + |
| FTT_1350  | Type 6 System  | + | - |
| FTT_1351  | Type 6 System  | + | - |
| FTT_1352  | Type 6 System  | + | - |
| FTT_1353  | Type 6 System  | + | - |
| FTT_1354  | Type 6 System  | + | Φ |
| FTT_1355  | Type 6 System  | + | + |
| FTT_1356c | Type 6 System  | + | - |
| FTT_1357c | Type 6 System  | + | - |
| FTT_1358c | Type 6 System  | + | - |
| FTT_1359c | Type 6 System  | + | - |
| FTT_1360c | Type 6 System  | + | - |
| FTT_1361c | Secreted       | Φ | + |
| FTT_1441  | Secreted       | + | Φ |
| FTT_1695  | Secreted       | + | + |
| FTT_1696  | Secreted       | + | + |
| FTT_1724c | Type 1 System  | + | + |

---

<sup>a</sup>Based on Meibom et al. 2010 and Rowe et al. 2015.

<sup>b</sup>From NC\_006570.2

<sup>c</sup>Gene present (+), absent (-), pseudogenized (Φ).

**Table S3.** Summary of read assignments and coverage depth of FLE-Am contigs.

| Contig | Length<br>(bp) | Reads<br>Mapped | Coverage<br>Depth |
|--------|----------------|-----------------|-------------------|
| 1      | 454,721        | 355,833         | 75.88             |
| 2      | 386,665        | 341,266         | 84.3              |
| 3      | 269,887        | 223,506         | 77.35             |
| 4      | 250,614        | 197,334         | 76.11             |
| 5      | 89,993         | 77,907          | 83.26             |
| 6      | 88,538         | 76,923          | 84.96             |
| 7      | 15,837         | 12,909          | 77.21             |

**Table S4.** Genes in FLE-Am not present in *F. tularensis* SCHU-S4.

| Locus tag   | Function <sup>a</sup>                                      |
|-------------|------------------------------------------------------------|
| AS144_06750 | 23S rRNA (pseudouridine(1915)-N(3))-methyltransferase RlmH |
| AS144_00955 | amino acid transporter                                     |
| AS144_05620 | anhydro-N-acetylmuramic acid kinase                        |
| AS144_07080 | cytochrome BD oxidase subunit I                            |
| AS144_02345 | D-tyrosyl-tRNA(Tyr) deacylase                              |
| AS144_01600 | death-on-curing protein                                    |
| AS144_01245 | deoxyribodipyrimidine photolyase                           |
| AS144_05170 | flippase                                                   |
| AS144_06210 | GDP-fucose synthetase                                      |
| AS144_06215 | GDP-mannose 4,6-dehydratase                                |
| AS144_01825 | glutaredoxin                                               |
| AS144_05350 | glycosyl transferase                                       |
| AS144_06075 | glycosyl transferase                                       |
| AS144_06085 | glycosyl transferase                                       |
| AS144_06090 | glycosyl transferase                                       |
| AS144_06095 | glycosyl transferase                                       |
| AS144_06080 | glycosyl transferase family 1                              |
| AS144_00750 | hypothetical protein                                       |
| AS144_01240 | hypothetical protein                                       |
| AS144_01260 | hypothetical protein                                       |
| AS144_01390 | hypothetical protein                                       |
| AS144_01595 | hypothetical protein                                       |
| AS144_01615 | hypothetical protein                                       |
| AS144_01620 | hypothetical protein                                       |
| AS144_01625 | hypothetical protein                                       |
| AS144_01630 | hypothetical protein                                       |
| AS144_01640 | hypothetical protein                                       |
| AS144_01670 | hypothetical protein                                       |
| AS144_01780 | hypothetical protein                                       |
| AS144_01795 | hypothetical protein                                       |
| AS144_01815 | hypothetical protein                                       |
| AS144_01840 | hypothetical protein                                       |
| AS144_01885 | hypothetical protein                                       |
| AS144_01950 | hypothetical protein                                       |
| AS144_01955 | hypothetical protein                                       |
| AS144_01960 | hypothetical protein                                       |
| AS144_01965 | hypothetical protein                                       |
| AS144_01970 | hypothetical protein                                       |
| AS144_01975 | hypothetical protein                                       |
| AS144_02120 | hypothetical protein                                       |
| AS144_02125 | hypothetical protein                                       |

|             |                      |
|-------------|----------------------|
| AS144_02130 | hypothetical protein |
| AS144_02135 | hypothetical protein |
| AS144_02140 | hypothetical protein |
| AS144_02145 | hypothetical protein |
| AS144_02180 | hypothetical protein |
| AS144_02260 | hypothetical protein |
| AS144_02270 | hypothetical protein |
| AS144_02310 | hypothetical protein |
| AS144_02625 | hypothetical protein |
| AS144_02710 | hypothetical protein |
| AS144_02775 | hypothetical protein |
| AS144_02785 | hypothetical protein |
| AS144_02865 | hypothetical protein |
| AS144_02975 | hypothetical protein |
| AS144_02980 | hypothetical protein |
| AS144_02985 | hypothetical protein |
| AS144_02990 | hypothetical protein |
| AS144_02995 | hypothetical protein |
| AS144_03000 | hypothetical protein |
| AS144_03005 | hypothetical protein |
| AS144_03010 | hypothetical protein |
| AS144_03015 | hypothetical protein |
| AS144_03020 | hypothetical protein |
| AS144_03055 | hypothetical protein |
| AS144_03610 | hypothetical protein |
| AS144_03635 | hypothetical protein |
| AS144_03715 | hypothetical protein |
| AS144_03720 | hypothetical protein |
| AS144_03790 | hypothetical protein |
| AS144_03895 | hypothetical protein |
| AS144_04105 | hypothetical protein |
| AS144_04135 | hypothetical protein |
| AS144_03505 | hypothetical protein |
| AS144_04210 | hypothetical protein |
| AS144_04435 | hypothetical protein |
| AS144_04595 | hypothetical protein |
| AS144_04745 | hypothetical protein |
| AS144_04750 | hypothetical protein |
| AS144_04800 | hypothetical protein |
| AS144_04840 | hypothetical protein |
| AS144_04870 | hypothetical protein |
| AS144_04875 | hypothetical protein |
| AS144_04885 | hypothetical protein |
| AS144_04925 | hypothetical protein |



AS144\_05115 hypothetical protein  
AS144\_05120 hypothetical protein  
AS144\_05125 hypothetical protein  
AS144\_05130 hypothetical protein  
AS144\_05135 hypothetical protein  
AS144\_05145 hypothetical protein  
AS144\_05150 hypothetical protein  
AS144\_05175 hypothetical protein  
AS144\_05180 hypothetical protein  
AS144\_05220 hypothetical protein  
AS144\_05235 hypothetical protein  
AS144\_04265 hypothetical protein  
AS144\_05575 hypothetical protein  
AS144\_05590 hypothetical protein  
AS144\_05595 hypothetical protein  
AS144\_05715 hypothetical protein  
AS144\_05770 hypothetical protein  
AS144\_5815 hypothetical protein  
AS144\_05820 hypothetical protein  
AS144\_05825 hypothetical protein  
AS144\_05830 hypothetical protein  
AS144\_05990 hypothetical protein  
AS144\_06065 hypothetical protein  
AS144\_06100 hypothetical protein  
AS144\_06105 hypothetical protein  
AS144\_06110 hypothetical protein  
AS144\_06120 hypothetical protein  
AS144\_06125 hypothetical protein  
AS144\_06130 hypothetical protein  
AS144\_06135 hypothetical protein  
AS144\_06140 hypothetical protein  
AS144\_06145 hypothetical protein  
AS144\_06150 hypothetical protein  
AS144\_06155 hypothetical protein  
AS144\_06235 hypothetical protein  
AS144\_06240 hypothetical protein  
AS144\_06245 hypothetical protein  
AS144\_06250 hypothetical protein  
AS144\_06315 hypothetical protein  
AS144\_06435 hypothetical protein  
AS144\_06545 hypothetical protein  
AS144\_06550 hypothetical protein  
AS144\_06970 hypothetical protein  
AS144\_07240 hypothetical protein

|             |                                                                       |
|-------------|-----------------------------------------------------------------------|
| AS144_07250 | hypothetical protein                                                  |
| AS144_07260 | hypothetical protein                                                  |
| AS144_07390 | hypothetical protein                                                  |
| AS144_07160 | hypothetical protein                                                  |
| AS144_07545 | hypothetical protein                                                  |
| AS144_07550 | hypothetical protein                                                  |
| AS144_07555 | hypothetical protein                                                  |
| AS144_07560 | hypothetical protein                                                  |
| AS144_07565 | hypothetical protein                                                  |
| AS144_07585 | hypothetical protein                                                  |
| AS144_06220 | mannose-1-phosphate guanylyltransferase/mannose-6-phosphate isomerase |
| AS144_03850 | mannose-6-phosphate isomerase                                         |
| AS144_05355 | mannosyltransferase                                                   |
| AS144_06935 | mechanosensitive ion channel protein MscS                             |
| AS144_04605 | MFS sugar transporter                                                 |
| AS144_02935 | MFS transporter                                                       |
| AS144_04835 | Nif3-like dinuclear metal center hexameric protein                    |
| AS144_01865 | phage infection protein                                               |
| AS144_05360 | polymerase                                                            |
| AS144_02335 | prephenate dehydrogenase                                              |
| AS144_06175 | pseudaminic acid cytidyltransferase                                   |
| AS144_06165 | pseudaminic acid synthase                                             |
| AS144_06045 | recombination factor protein RarA                                     |
| AS144_05165 | SAM-dependent methyltransferase                                       |
| AS144_02895 | serine permease                                                       |
| AS144_06115 | teichoic acid ABC transporter permease                                |
| AS144_05710 | transporter                                                           |
| AS144_06180 | UDP-4-amino-4,6-dideoxy-N-acetyl-beta-L-altrosamine transaminase      |
| AS144_06185 | UDP-N-acetylglucosamine 4,6-dehydratase (inverting)                   |

---

<sup>a</sup>Function assigned by NCBI Prokaryotic Genome Annotation Pipeline.
